# Supplementary material for: Hashimoto’s Thyroiditis and the Risk of Papillary Thyroid Cancer in Children
Source: MDPI journal article supplement (doi:10.3390/cancers15194902), 2023-10-09
Supplement: s1 [file s1]

Supplementary Materials for:

**Hashimoto's Thyroiditis and the Risk of Papillary Thyroid Cancer in Children**

Jean-Nicolas Gallant, Vivian L. Weiss, Sheau-Chiann Chen, Jiancong Liang, Ryan H. Belcher, Fei Ye, Hernan Correa, and Huiying Wang

|                                                                                                     |   |
|-----------------------------------------------------------------------------------------------------|---|
| <b>Table S1:</b> Pathology details of patients with outcome data .....                              | 2 |
| <b>Table S2:</b> Pathology details and outcomes of classic PTC patients .....                       | 3 |
| <b>Figure S1:</b> Survival of pediatric classic PTC patients with/out Hashimoto's thyroiditis ..... | 4 |

| Variable                                                        | All patients (n = 83) | Without HT (n = 57) | With HT (n = 26) | Statistic             |
|-----------------------------------------------------------------|-----------------------|---------------------|------------------|-----------------------|
| Maximal diameter, cm, median (Q <sub>1</sub> , Q <sub>3</sub> ) | 1.8 (1.0, 3.6)        | 2.0 (1.1, 3.5)      | 1.8 (1.0, 3.6)   | p = 0.98 <sup>a</sup> |
| T, n (%)                                                        |                       |                     |                  | p = 0.27 <sup>b</sup> |
| T1a                                                             | 21 (25.3)             | 14 (24.6)           | 7 (26.9)         |                       |
| T1b                                                             | 19 (22.9)             | 10 (17.5)           | 9 (34.6)         |                       |
| T2                                                              | 15 (18.1)             | 13 (22.8)           | 2 (7.7)          |                       |
| T3a                                                             | 15 (18.1)             | 9 (15.8)            | 6 (23.1)         |                       |
| T3b                                                             | 7 (8.4)               | 6 (10.5)            | 1 (3.8)          |                       |
| T4a                                                             | 6 (7.2)               | 5 (8.8)             | 1 (3.8)          |                       |
| N, n (%)                                                        |                       |                     |                  | p = 0.20 <sup>b</sup> |
| NX                                                              | 12 (14.5)             | 10 (17.5)           | 2 (7.7)          |                       |
| N0                                                              | 16 (19.3)             | 9 (15.8)            | 7 (26.9)         |                       |
| N1a                                                             | 15 (18.1)             | 8 (14.0)            | 7 (26.9)         |                       |
| N1b                                                             | 40 (48.2)             | 30 (52.6)           | 10 (38.5)        |                       |
| M, n (%)                                                        | 3 (3.6)               | 3 (5.3)             | 0 (0.0)          | p = 0.55 <sup>b</sup> |
| Multifocal disease, n (%)                                       | 37 (44.6)             | 25 (43.9)           | 12 (46.2)        | p = 0.85 <sup>c</sup> |
| Extra-thyroidal extension, n (%)                                |                       |                     |                  | p = 0.77 <sup>b</sup> |
| Microscopic                                                     | 12 (14.5)             | 9 (15.8)            | 3 (11.5)         |                       |
| Gross                                                           | 2 (2.4)               | 2 (3.5)             | 0 (0.0)          |                       |
| Extra-nodal extension, n (%)                                    | 23 (62.2)             | 18 (66.7)           | 5 (50.0)         | p = 0.45 <sup>b</sup> |
| Vascular invasion, n (%)                                        |                       |                     |                  | p = 0.40 <sup>c</sup> |
| Present                                                         | 17 (21.2)             | 13 (24.1)           | 4 (15.4)         |                       |
| Extensive                                                       | 18 (22.5)             | 10 (18.5)           | 8 (30.8)         |                       |
| Lymphatic invasion, n (%)                                       | 36 (44.4)             | 24 (43.6)           | 12 (46.2)        | p = 0.83 <sup>c</sup> |
| ATA, n (%)                                                      |                       |                     |                  | p = 0.40 <sup>b</sup> |
| Low                                                             | 39 (47.0)             | 24 (42.1)           | 15 (57.7)        |                       |
| Intermediate                                                    | 8 (9.6)               | 6 (10.5)            | 2 (7.7)          |                       |
| High                                                            | 36 (43.4)             | 27 (47.4)           | 9 (34.6)         |                       |

**Table S1: Pathology details of patients with outcome data**

Abbreviations: HT, Hashimoto's thyroiditis; Q<sub>1</sub>, lower quartile (25<sup>th</sup> percentile); Q<sub>3</sub>, upper quartile (75<sup>th</sup> percentile); T, tumor stage; N, nodal stage; M, presence of distant metastases; ATA, American Thyroid Association risk category

<sup>a</sup> Welch's two sample t-test. Data are analyzed on a natural log scale.

<sup>b</sup> Fisher's exact test

<sup>c</sup> Pearson's Chi-squared test

| Variable                                                        | Classic PTC (n = 59) | Without HT (n = 41) | With HT (n = 18) | Statistic             |
|-----------------------------------------------------------------|----------------------|---------------------|------------------|-----------------------|
| Maximal diameter, cm, median (Q <sub>1</sub> , Q <sub>3</sub> ) | 1.6 (0.8, 3.0)       | 1.6 (1.0, 3.2)      | 1.6 (0.7, 1.9)   | p = 0.64 <sup>a</sup> |
| T, n (%)                                                        |                      |                     |                  | p = 0.13 <sup>b</sup> |
| T1a                                                             | 18 (30.5)            | 12 (29.3)           | 6 (33.3)         |                       |
| T1b                                                             | 16 (27.1)            | 8 (19.5)            | 8 (44.4)         |                       |
| T2                                                              | 8 (13.6)             | 8 (19.5)            | 0 (0.0)          |                       |
| T3a                                                             | 9 (15.3)             | 6 (14.6)            | 3 (16.7)         |                       |
| T3b                                                             | 4 (6.8)              | 4 (9.8)             | 0 (0.0)          |                       |
| T4a                                                             | 4 (6.8)              | 3 (7.3)             | 1 (5.6)          |                       |
| N, n (%)                                                        |                      |                     |                  | p = 0.02 <sup>b</sup> |
| NX                                                              | 10 (16.9)            | 8 (19.5)            | 2 (11.1)         |                       |
| N0                                                              | 10 (16.9)            | 4 (9.8)             | 6 (33.3)         |                       |
| N1a                                                             | 15 (25.4)            | 8 (19.5)            | 7 (38.9)         |                       |
| N1b                                                             | 24 (40.7)            | 21 (51.2)           | 3 (16.7)         |                       |
| M, n (%)                                                        | 2 (3.4)              | 2 (11.1)            | 0 (0.0)          | p = 0.99 <sup>c</sup> |
| Multifocal disease, n (%)                                       | 26 (44.0)            | 18 (43.9)           | 8 (44.4)         | p = 0.97 <sup>c</sup> |
| Extra-thyroidal extension, n (%)                                |                      |                     |                  | p = 0.57 <sup>b</sup> |
| Microscopic                                                     | 7 (11.9)             | 6 (14.6)            | 1 (5.6)          |                       |
| Gross                                                           | 2 (3.4)              | 2 (11.1)            | 0 (0.0)          |                       |
| Extra-nodal extension, n (%)                                    | 16 (27.1)            | 13 (31.7)           | 3 (16.7)         | p = 0.48 <sup>c</sup> |
| Vascular invasion, n (%)                                        |                      |                     |                  | p = 0.85 <sup>b</sup> |
| Present                                                         | 13 (22.0)            | 10 (24.4)           | 3 (16.7)         |                       |
| Extensive                                                       | 9 (15.3)             | 6 (14.6)            | 3 (16.7)         |                       |
| Lymphatic invasion, n (%)                                       | 22 (37.2)            | 16 (39.0)           | 6 (33.3)         | p = 0.63 <sup>c</sup> |
| ATA, n (%)                                                      |                      |                     |                  | p = 0.04 <sup>b</sup> |
| Low                                                             | 31 (52.5)            | 17 (41.4)           | 14 (77.8)        |                       |
| Intermediate                                                    | 6 (10.2)             | 5 (12.2)            | 1 (5.6)          |                       |
| High                                                            | 22 (37.3)            | 19 (46.3)           | 3 (16.7)         |                       |
| Surgeries, n (%)                                                | 1 (1–2)              | 1 (1–2)             | 1 (1–2)          | p = 0.46 <sup>b</sup> |
| 1                                                               | 41 (69.5)            | 28 (68.3)           | 13 (72.2)        |                       |
| 2                                                               | 14 (23.7)            | 9 (22.0)            | 5 (27.8)         |                       |
| 3                                                               | 4 (6.8)              | 4 (9.8)             | 0 (0.0)          |                       |
| RAI treatments, n (%)                                           |                      |                     |                  | p = 0.33 <sup>a</sup> |
| 0                                                               | 22 (37.3)            | 13 (31.7)           | 9 (50.0)         |                       |
| 1                                                               | 30 (50.8)            | 21 (51.2)           | 9 (50.0)         |                       |
| 2                                                               | 4 (6.8)              | 4 (9.8)             | 0 (0.0)          |                       |
| 3                                                               | 3 (5.1)              | 3 (7.3)             | 0 (0.0)          |                       |
| Outcomes, n (%)                                                 |                      |                     |                  | p = 0.03 <sup>b</sup> |
| Good                                                            | 42 (71.2)            | 25 (61.0)           | 17 (94.4)        |                       |
| Indeterminate                                                   | 5 (8.5)              | 5 (12.2)            | 0 (0.0)          |                       |
| Poor                                                            | 12 (20.3)            | 11 (26.8)           | 1 (5.6)          |                       |
| PFS, survival rate, % (CI)                                      |                      |                     |                  | p = 0.68 <sup>d</sup> |
| 60 Months                                                       | 88 (77–100)          | 85 (71–100)         | 93 (80–100)      |                       |
| 120 Months                                                      | 88 (77–100)          | 85 (71–100)         | 93 (80–100)      |                       |
| 180 Months                                                      | 88 (77–100)          | 85 (71–100)         | 93 (80–100)      |                       |
| 226.7 Months                                                    | 88 (77–100)          | NA                  | 93 (80–100)      |                       |

**Table S2: Pathology details and outcomes of classic PTC patients**

Abbreviations: HT, Hashimoto's thyroiditis; Q<sub>1</sub>, lower quartile (25<sup>th</sup> percentile); Q<sub>3</sub>, upper quartile (75<sup>th</sup> percentile); T, tumor stage; N, nodal stage; M, presence of distant metastases; ATA, American Thyroid Association risk category; RAI, radioactive iodine; PFS, progression-free survival; CI, 95% confidence intervals; NA, not available.

<sup>a</sup> Welch's two sample t-test. Data are analyzed on a natural log scale.

<sup>b</sup> Fisher's exact test

<sup>c</sup> Pearson's Chi-squared test

<sup>d</sup> Log-rank test

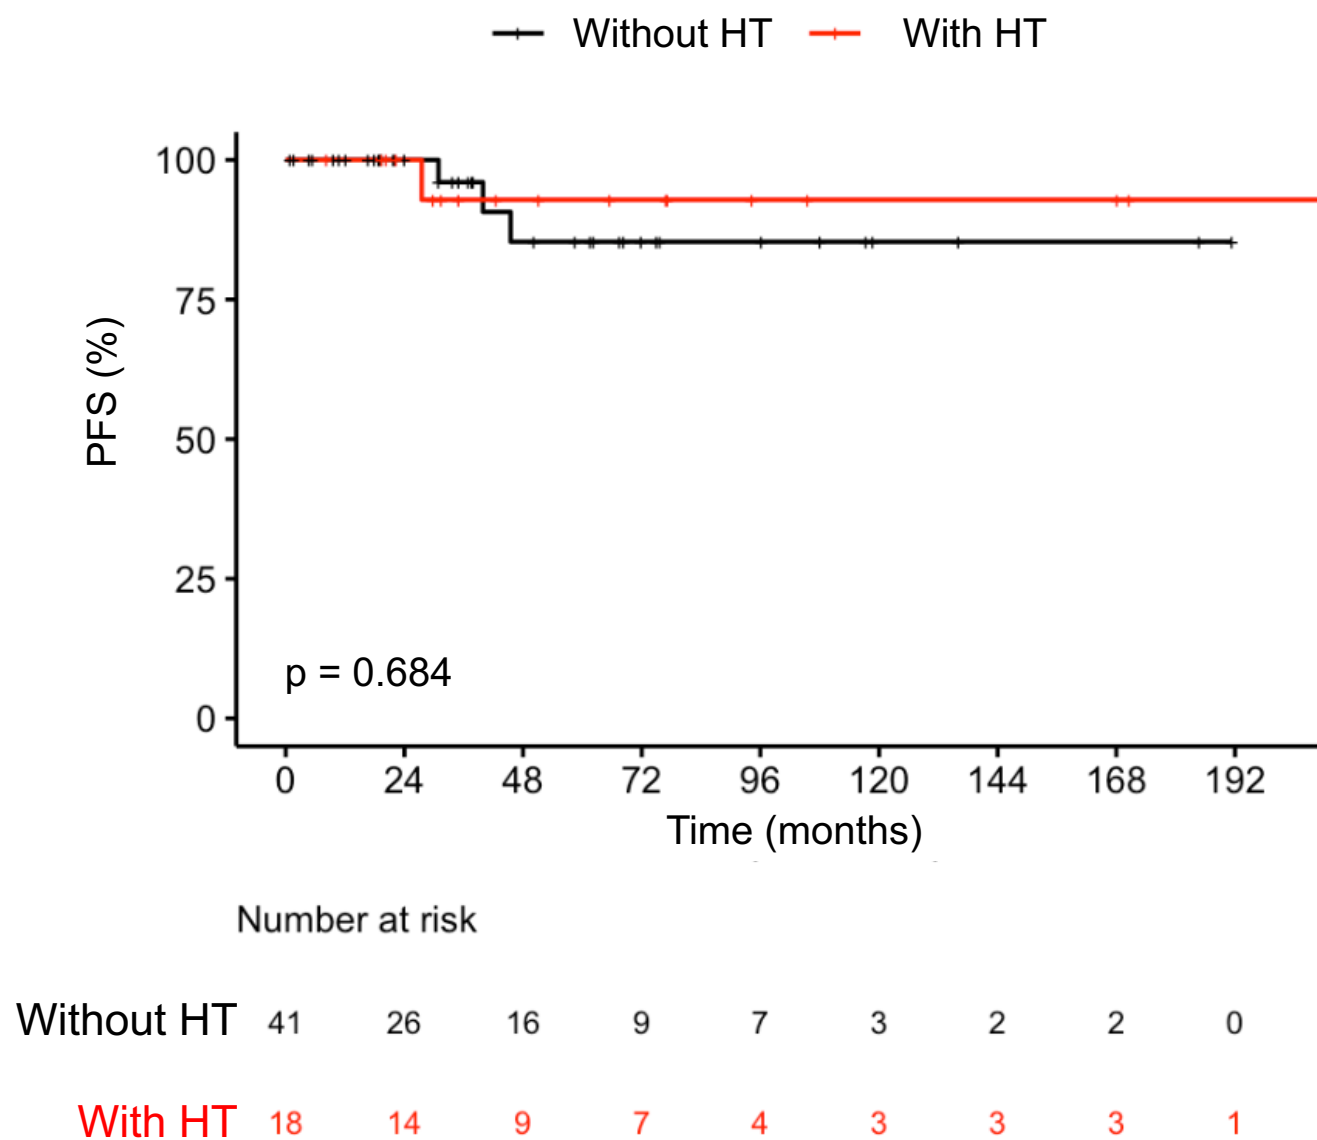

**Figure S1: Survival of pediatric classic PTC patients with/out Hashimoto's thyroiditis**

Abbreviations: HT, Hashimotos' thyroiditis; PFS, progression-free survival; ; p, p-value from log-rank test used to compare the PFS of groups.
